# Supplementary material for: Sintering-resistant Pt@CeO2 nanoparticles for high-temperature oxidation catalysis
Source: Royal Society of Chemistry journal article supplement (doi:10.1039/c6nr00170j), 2016-01-01
Supplement: c6nr00170j1.pdf [file c6nr00170j1.pdf]

## **Sintering-resistant Pt@CeO<sub>2</sub> nanoparticles for high-temperature oxidation catalysis**

Siwon Lee<sup>a</sup>, Jongsu Seo<sup>a</sup>, and WooChul Jung<sup>a,\*</sup>

*<sup>a</sup>Department of Materials Science and Engineering, Korea Advanced Institute of Science and Technology  
(KAIST), 291 Daehak-ro, Yuseong-gu, Daejeon, 305–701, Republic of Korea*

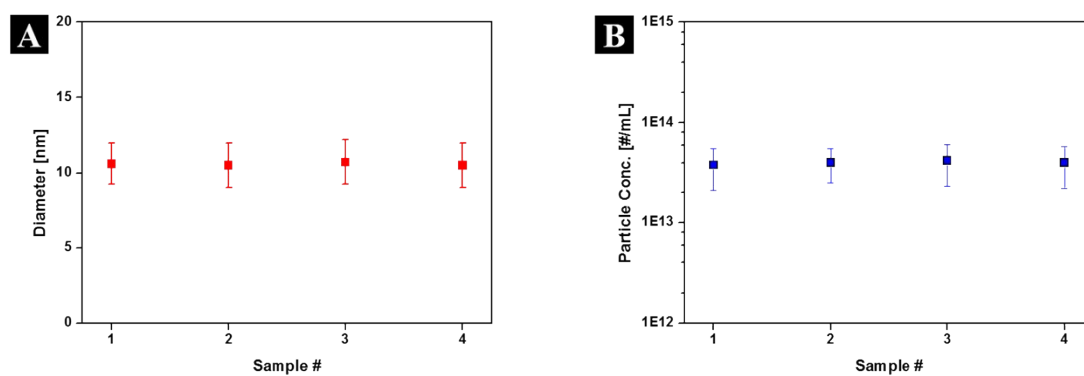

**Fig. S1.** The graphs of (A) an average diameter, and (B) an average particle concentration of each Pt nanoparticle, synthesized under the same condition.

**Table S1.** Results of reproducibility on synthesized Pt nanoparticles.

| <sup>a</sup> Sample #                                     | sample 1                       | sample 2                       | Sample 3                       | sample 4                       |
|-----------------------------------------------------------|--------------------------------|--------------------------------|--------------------------------|--------------------------------|
| <sup>b</sup> Average diameter [nm]                        | 10.6 ± 1.4                     | 10.5 ± 1.5                     | 10.7 ± 1.5                     | 10.5 ± 1.5                     |
| ICP-MS [ppm]                                              | 493.3                          | 476.8                          | 527.2                          | 499.3                          |
| <sup>c</sup> Particle Concentration [# mL <sup>-1</sup> ] | 3.8 (± 1.7) × 10 <sup>13</sup> | 4.0 (± 1.5) × 10 <sup>13</sup> | 4.2 (± 1.9) × 10 <sup>13</sup> | 4.0 (± 1.8) × 10 <sup>13</sup> |

<sup>a</sup> Sample 1-4 (Pt nanoparticles) were synthesized under the same condition at different days.

<sup>b</sup> Average diameter of each sample was evaluated by counting 200 different particles.

<sup>c</sup> Particle concentration was calculated by assuming sphere-shaped particles and using average diameters, a density of Pt (21.46 g cm<sup>-3</sup>) and ICPMS results.

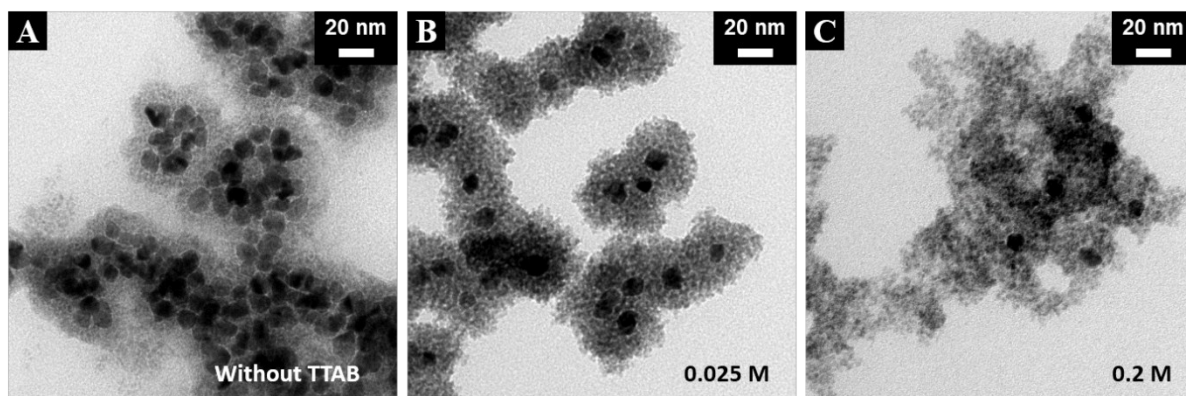

**Fig. S2.** TEM images of Pt@CeO<sub>2</sub> nanocomposites synthesized with different amount of TTAB surfactant. (A) without TTAB, (B) 0.025 M of TTAB, and (C) 0.2 M of TTAB. Individual Pt nanoparticles are distantly encapsulated by ceria shells with a uniform shell thickness when the concentration of TTAB is optimized at 0.025M.

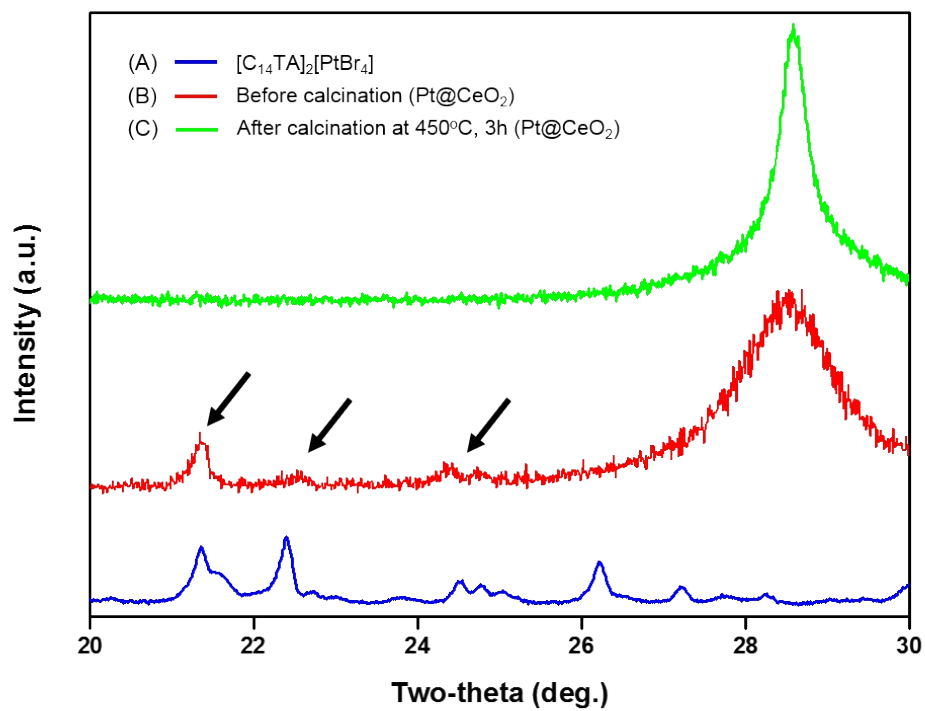

**Fig. S3.** The XRD pattern of  $[C_{14}TA]_2[PtBr_4]$  (A). The XRD pattern of  $Pt@CeO_2$  nanocomposite before (B) and after (C) calcination at 450 °C for 3 hours.

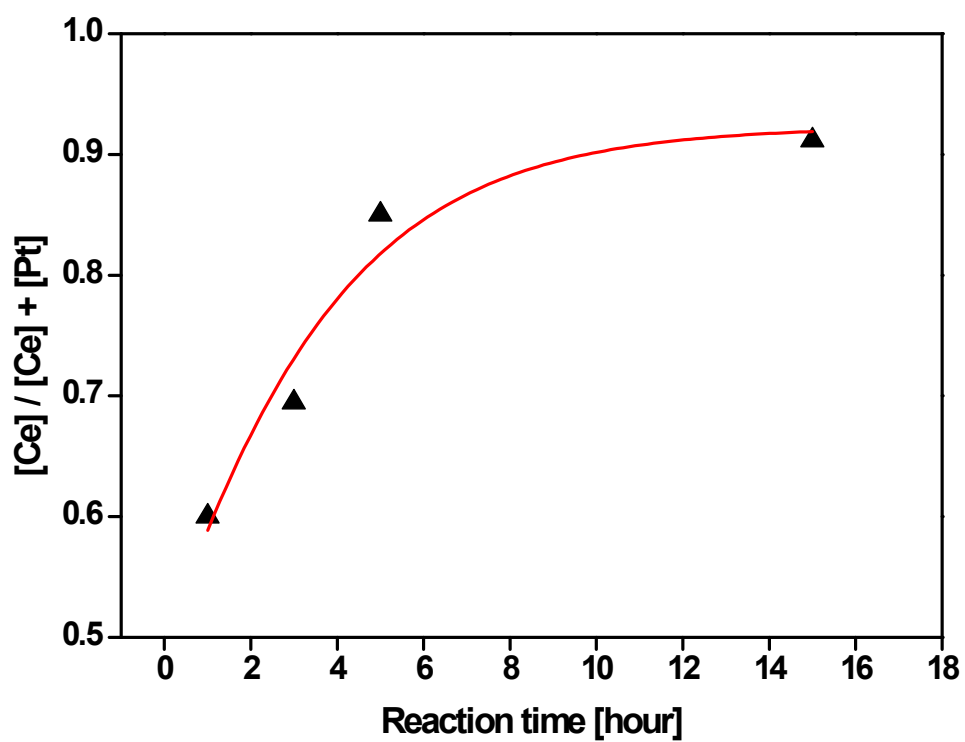

**Fig. S4.** The concentration of Pt@CeO<sub>2</sub> nanocomposite with respect to the reaction time, showing that continuous heterogeneous nucleation occurs until all of the cerium precursors are consumed.

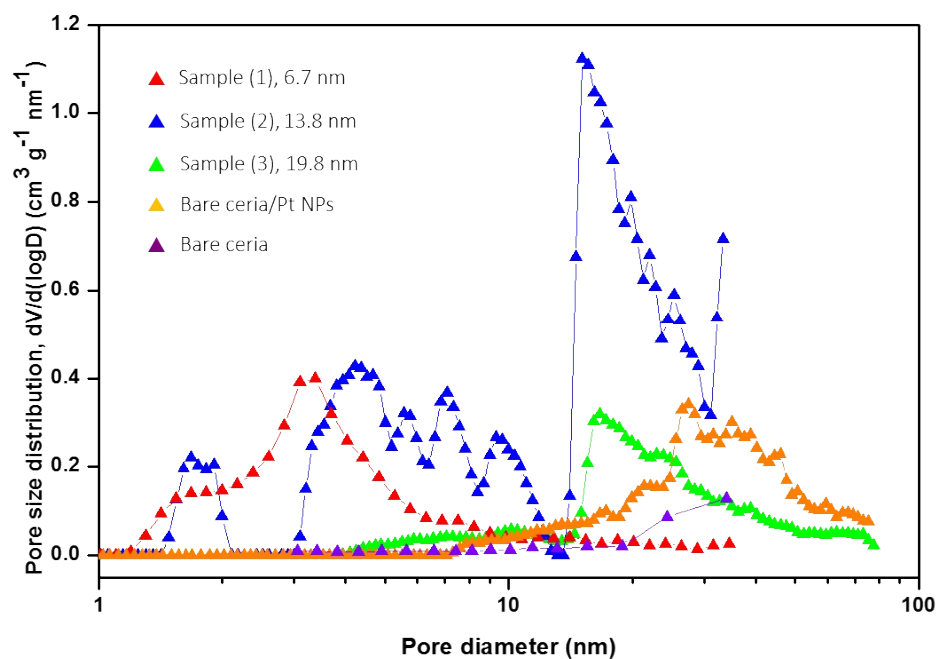

**Fig. S5.** Pore size distributions for five different samples. Pt@CeO<sub>2</sub> core-shell composites with the shell thickness of 6.7 nm (red triangle), 13.8 nm (blue triangle) and 19.8 nm (green triangle), a bare mixture of Pt and ceria (orange triangle) and a pure ceria (purple triangle).

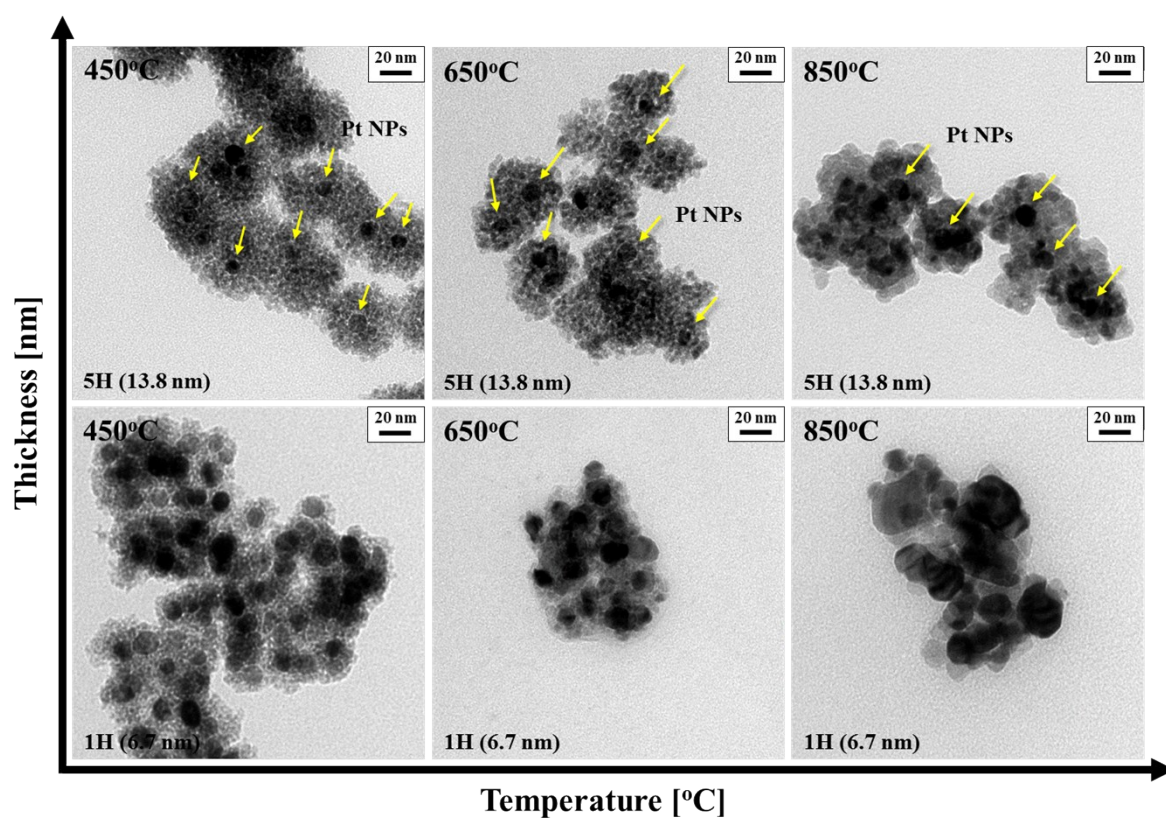

**Fig. S6.** TEM images showing the morphological change of Pt@CeO<sub>2</sub> nanocomposites upon annealing for two different samples (Pt@CeO<sub>2</sub> (6.7 nm) – first row, Pt@CeO<sub>2</sub> (13.8 nm) – second row). All the samples were calcined at 450 °C to remove any remaining organic materials. (450 °C: as-synthesized sample)



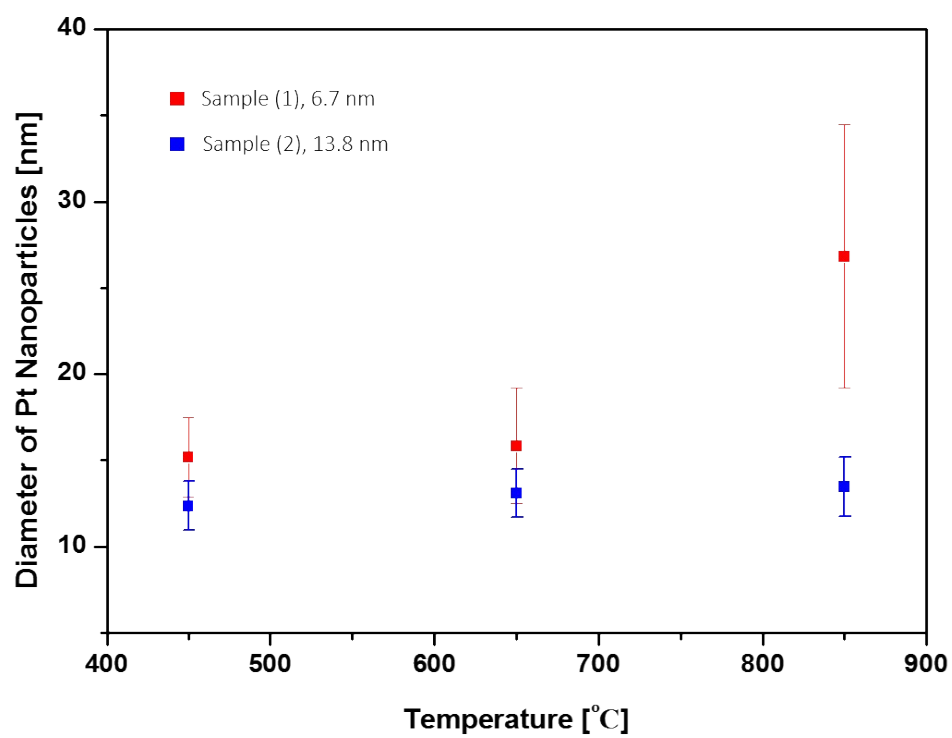

**Fig. S7.** The change in the size and size distribution of Pt nanoparticles in the core-shell composites after annealing at 450 °C, 650 °C, and 850 °C, respectively.

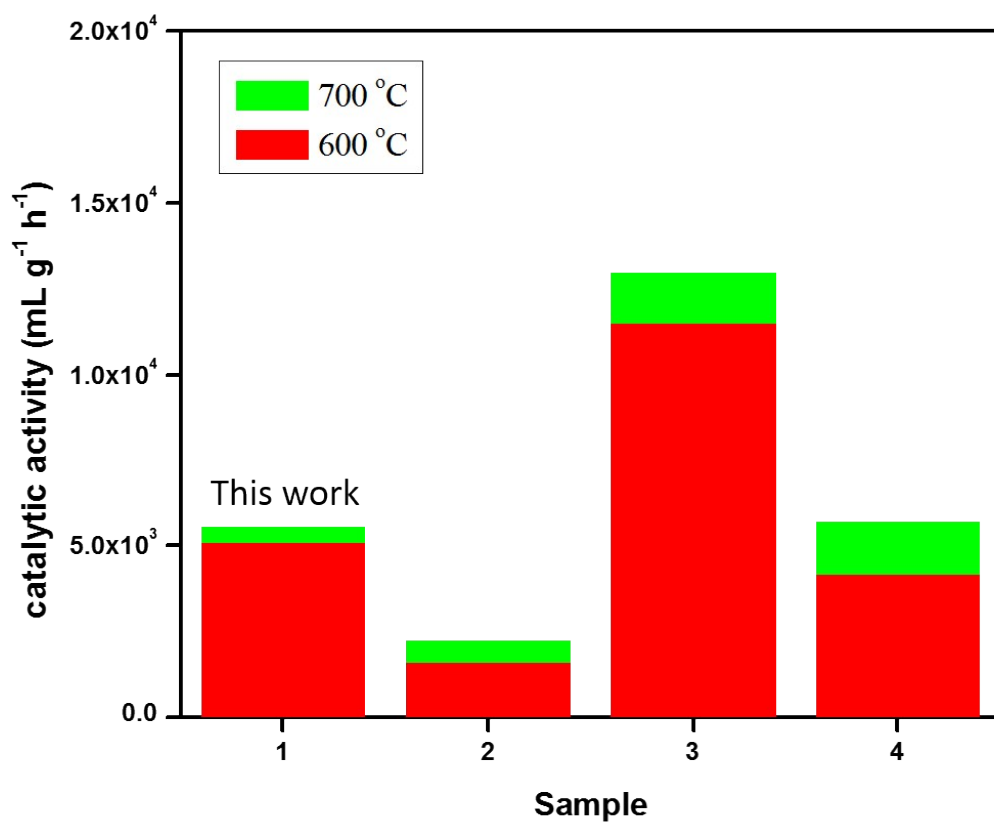

**Fig. S8.** Comparison of the catalytic activities for CH<sub>4</sub> combustion between different Pt/CeO<sub>2</sub> composite catalysts. #1: Pt@CeO<sub>2</sub> (13.8 nm) in this study, #2-4: samples reported in literatures <sup>[1-3]</sup>.

**Table S2.** Catalytic activity results between different Pt/CeO<sub>2</sub> composite catalysts.

| T(°C) | Sample number    | Catalytic activity (mL g <sup>-1</sup> h <sup>-1</sup> ) |
|-------|------------------|----------------------------------------------------------|
| 600   | 1 (this study)   | 5.056E+03                                                |
|       | 2 <sup>[1]</sup> | 1.593E+03                                                |
|       | 3 <sup>[2]</sup> | 1.148E+04                                                |
|       | 4 <sup>[3]</sup> | 4.140E+03                                                |
| 700   | 1 (this study)   | 5.556E+03                                                |
|       | 2 <sup>[1]</sup> | 2.238E+03                                                |
|       | 3 <sup>[2]</sup> | 1.296E+04                                                |
|       | 4 <sup>[3]</sup> | 5.700E+03                                                |

## References

- (1) Y. Zhu, S. Zhang, J-J Shan, L. Nguyen, S. Zhan, X. Gu, and F. Tao, *ACS Catal.*, 2013, **3**, 2627-2639.
- (2) W. Tang, Z. Hu, M. Wang, G. D. Stucky, H. Metiu, and E. W. McFarland, *J. Catal.*, 2010, **273**, 125-137.
- (3) P. Pantu, G. R. Gavalas, *Appl. Catal. A-Gen.*, 2002, **223**, 253-260.
